# Supplementary material
Source: PubMed Central journal article supplement (PMC3541936)
Supplement: mmc4.pdf [file mmc4.pdf]

**eTable 1. Characteristics of Patients from Fudan University Shanghai Cancer Center**

| Characteristic                             |           | Total=335 |      |
|--------------------------------------------|-----------|-----------|------|
|                                            |           | n         | %    |
| Age                                        | ≤50       | 208       | 62.1 |
|                                            | >50       | 127       | 37.9 |
| Neoadjuvant chemotherapy cycle             | 2-3       | 234       | 69.9 |
|                                            | 4-6       | 101       | 30.1 |
| Tumor size before neoadjuvant chemotherapy | 40-60 mm  | 142       | 42.4 |
|                                            | 60-80 mm  | 193       | 57.6 |
| Lymph node status                          | Negative* | 73        | 21.8 |
|                                            | Positive* | 262       | 78.2 |
| pCR in breast                              | Non-pCR   | 303       | 90.4 |
|                                            | pCR       | 32        | 9.6  |
| pCR in breast and nodes                    | Non-pCR   | 315       | 94.0 |
|                                            | pCR       | 20        | 6.0  |
| Grade                                      | I         | 3         | 1.5  |
|                                            | II        | 135       | 69.2 |
|                                            | III       | 57        | 29.2 |
|                                            | Unknown   | 140       |      |
| ER (before neoadjuvant chemotherapy)       | Negative  | 88        | 56.8 |
|                                            | Positive  | 67        | 43.2 |
|                                            | Unknown   | 180       |      |
| ER (after surgery)                         | negative  | 177       | 60.8 |
|                                            | Positive  | 114       | 39.2 |
|                                            | Unknown   | 44        |      |
| PR (before neoadjuvant chemotherapy)       | Negative  | 90        | 58.1 |
|                                            | Positive  | 65        | 41.9 |
|                                            | Unknown   | 180       |      |
| PR (after surgery)                         | negative  | 189       | 64.9 |
|                                            | Positive  | 102       | 35.1 |
|                                            | Unknown   | 44        |      |
| HER2 (before neoadjuvant chemotherapy)     | Negative  | 104       | 68.0 |
|                                            | Positive  | 49        | 32.0 |
|                                            | Unknown   | 182       |      |
| HER2 (after surgery)                       | negative  | 215       | 74.7 |
|                                            | Positive  | 73        | 25.3 |
|                                            | Unknown   | 47        |      |
| Adjuvant chemotherapy                      | No        | 27        | 8.1  |
|                                            | Yes       | 308       | 91.9 |
| Adjuvant radiotherapy                      | No        | 46        | 13.7 |
|                                            | Yes       | 289       | 86.3 |
| Adjuvant endocrine therapy                 | No        | 187       | 55.8 |
|                                            | Yes       | 148       | 44.2 |

\*Lymph node (LN) negative cases represent patients with both clinically detected LN-negative before NCT and pathologically confirmed LN-negative after surgery; LN positive cases represent patients with either clinically detected LN-positive before NCT or pathologically confirmed LN-positive after surgery. "Clinically detected" is defined as detected by imaging studies or by clinical examination and having characteristics highly suspicious for involved LN or a presumed pathologic macro-metastasis based on fine needle aspiration biopsy with cytologic examination.
