# Supplementary material
Source: PubMed Central journal article supplement (PMC3541936)
Supplement: mmc5.pdf [file mmc5.pdf]

**eTable 2. Univariate Analysis With Log-Rank for 8-Year Breast Cancer-Specific Survival**

| <b>Patient Characteristic</b> | <b>8-Year BCSS</b> | <b>Log-Rank P</b> |
|-------------------------------|--------------------|-------------------|
| Year of diagnosis             |                    | <0.001            |
| 1990-1994                     | 80.3               |                   |
| 1995-1999                     | 85.0               |                   |
| 2000-2003                     | 86.4               |                   |
| Patient age, years            |                    | <0.001            |
| ≤50                           | 82.0               |                   |
| >50                           | 85.4               |                   |
| Race                          |                    | <0.001            |
| White                         | 84.9               |                   |
| Black                         | 73.4               |                   |
| Others*                       | 86.2               |                   |
| Unknown                       | N.C.               |                   |
| Tumor size, mm                |                    | <0.001            |
| 0-20                          | 91.1               |                   |
| 20-30                         | 77.3               |                   |
| 30-40                         | 68.0               |                   |
| 40-50                         | 65.0               |                   |
| 50-60                         | 61.2               |                   |
| 60-80                         | 57.6               |                   |
| >80                           | 50.7               |                   |
| Node status                   |                    | <0.001            |
| Negative                      | 91.8               |                   |
| Positive                      | 72.3               |                   |
| Grade                         |                    | <0.001            |
| I                             | 97.1               |                   |
| II                            | 89.1               |                   |
| III and UD                    | 75.7               |                   |
| Unknown                       | N.C.               |                   |
| ER status                     |                    | <0.001            |
| Negative                      | 75.3               |                   |
| Positive                      | 87.4               |                   |
| PR status                     |                    | <0.001            |
| Negative                      | 77.3               |                   |
| Positive                      | 87.9               |                   |
| No. of LNs dissected          |                    | <0.001            |
| 4-10                          | 86.4               |                   |
| 11-20                         | 83.8               |                   |
| ≥21                           | 81.2               |                   |

Abbreviations: BCSS = breast cancer-specific survival; ER = estrogen receptor; LN = lymph node; N.C. = Not calculated; PR = progesterone receptor; UD = undifferentiated

\*Including American Indian, Alaska Native, Asian, and Pacific Islander
