# Supplementary material
Source: PubMed Central journal article supplement (PMC3541936)
Supplement: mmc6.pdf [file mmc6.pdf]

**eTable 3. Univariate and Multivariate Analysis of Relapse-Free Survival and Distant Relapse-Free Survival in the Second Set**

| Characteristic                    | Relapse-Free Survival |            |              |              |        | Distant Relapse-Free Survival |            |              |              |        |
|-----------------------------------|-----------------------|------------|--------------|--------------|--------|-------------------------------|------------|--------------|--------------|--------|
|                                   | Univariate            |            | Multivariate |              |        | Univariate                    |            | Multivariate |              |        |
|                                   | 4-Year Rate           | Log-Rank P | HR           | 95% CI       | P      | 4-Year Rate                   | Log-Rank P | HR           | 95% CI       | P      |
| Patient age, years                |                       | 0.046      |              |              | 0.048  |                               | 0.031      |              |              | 0.033  |
| ≤50                               | 63.4                  |            | 1.00         | Ref.         |        | 69.6                          |            | 1.00         | Ref.         |        |
| >50                               | 51.3                  |            | 1.41         | 1.00 to 1.99 |        | 57.8                          |            | 1.51         | 1.03 to 2.20 |        |
| Neoadjuvant chemotherapy cycle    |                       | 0.222      |              |              | 0.008  |                               | 0.285      |              |              | 0.027  |
| 2-3                               | 60.0                  |            | 1.00         | Ref.         |        | 66.1                          |            | 1.00         | Ref.         |        |
| 4-6                               | 57.1                  |            | 1.75         | 1.15 to 2.64 |        | 63.9                          |            | 1.69         | 1.06 to 2.69 |        |
| Neoadjuvant chemotherapy response |                       | 0.010      |              |              | 0.021  |                               | 0.009      |              |              | 0.022  |
| Non-pCR                           | 56.6                  |            | 1.00         | Ref.         |        | 62.6                          |            | 1.00         | Ref.         |        |
| pCR                               | 81.6                  |            | 0.38         | 0.16 to 0.86 |        | 89.7                          |            | 0.31         | 0.11 to 0.84 |        |
| Adjuvant chemotherapy             |                       | 0.951      |              |              | 0.364  |                               | 0.786      |              |              | 0.579  |
| No                                | 62.1                  |            | 1.00         | Ref.         |        | 64.6                          |            | 1.00         | Ref.         |        |
| Yes                               | 58.8                  |            | 1.39         | 0.68 to 2.85 |        | 65.3                          |            | 1.24         | 0.58 to 2.68 |        |
| Adjuvant radiotherapy             |                       | 0.534      |              |              | 0.104  |                               | 0.415      |              |              | 0.153  |
| No                                | 63.2                  |            | 1.00         | Ref.         |        | 71.6                          |            | 1.00         | Ref.         |        |
| Yes                               | 58.2                  |            | 0.64         | 0.37 to 1.10 |        | 64.2                          |            | 0.64         | 0.35 to 1.18 |        |
| Adjuvant endocrine therapy        |                       | 0.607      |              |              | 0.453  |                               | 0.925      |              |              | 0.828  |
| No                                | 58.4                  |            | 1.00         | Ref.         |        | 66.0                          |            | 1.00         | Ref.         |        |
| Yes                               | 59.5                  |            | 0.88         | 0.62 to 1.24 |        | 64.3                          |            | 0.96         | 0.66 to 1.40 |        |
| Tumor size and nodes              |                       | <0.001     |              |              | <0.001 |                               | <0.001     |              |              | <0.001 |
| 40-60 mm N0                       | 82.2                  |            | 1.00         | Ref.         |        | 85.2                          |            | 1.00         | Ref.         |        |
| 60-80 mm N0                       | 82.1                  |            | 0.86         | 0.30 to 2.48 | 0.772  | 92.4                          |            | 0.52         | 0.14 to 1.96 | 0.336  |
| 40-60 mm N1+                      | 61.5                  |            | 2.30         | 0.96 to 5.49 | 0.062  | 64.3                          |            | 2.47         | 0.95 to 6.39 | 0.063  |
| 60-80 mm N1+                      | 46.3                  |            | 3.77         | 1.61 to 8.82 | 0.002  | 54.0                          |            | 3.66         | 1.44 to 9.31 | 0.006  |

Abbreviations: CI = confidence interval; HR = hazard ratio; pCR = pathological complete remission; Ref. = reference
